# Supplementary material
Source: publisher figshare collection journal article supplement (https://wiley.figshare.com/articles/dataset/_/3557433)
Supplement: Supplementary file 1 [file 1 › appendix-B.htm]

Ecological Archives E094-191-A2


*Ecological Archives* E094-191-A2

Jonas Knape, Panagiotis Besbeas, Perry de Valpine. 2013. Using uncertainty estimates in analyses of population time series. *Ecology* 94:2097–2107. http://dx.doi.org/10.1890/12-0712.1

Appendix B. Figures for Scenario 1.

> View / download PDF.


---

[Back to E094-191]
